# Supplementary material for: OptiClust, an Improved Method for Assigning Amplicon-Based Sequence Data to Operational Taxonomic Units
Source: mSphere. 2017 Mar 8;2(2):e00073-17. doi: 10.1128/mSphereDirect.00073-17 (PMC5343174; doi:10.1128/mSphereDirect.00073-17)
Supplement: TABLE S1 [file sph002172247st1.pdf]

**Table S1. Summary of the average number of true positives, true negatives, false positives, false negatives and the resulting Matthews correlation coefficient for each of the clustering methods that were analyzed in this study for each of the six datasets.** Blank values indicate that those conditions could not be completed in 50 hours with 45 GB of RAM.

| Dataset   | Method                    | True<br>Positives | True<br>Negatives | False<br>Positives | False<br>Negatives | MCC    |
|-----------|---------------------------|-------------------|-------------------|--------------------|--------------------|--------|
| Soil      | MCC (separate OTUs)       | 5136712           | 10312528053       | 1247993            | 2555568            | 0.7328 |
| Soil      | TP + TN                   | 4770846           | 10312976362       | 799684             | 2921434            | 0.7287 |
| Soil      | Accuracy                  | 4771037           | 10312974895       | 801151             | 2921243            | 0.7286 |
| Soil      | FPS + FNs                 | 4768761           | 10312976641       | 799405             | 2923519            | 0.7285 |
| Soil      | MCC (single OTU)          | 5399187           | 10311962308       | 1813738            | 2293093            | 0.7247 |
| Soil      | F1-score                  | 5453578           | 10311862032       | 1914014            | 2238702            | 0.7244 |
| Soil      | VSEARCH (w/AGC)           | 5953502           | 10305863000       | 7913046            | 1738778            | 0.5760 |
| Soil      | VSEARCH (w/AGC)           | 6684050           | 10301990342       | 11785704           | 1008230            | 0.5603 |
| Soil      | Sumaclus                  | 6689597           | 10301700186       | 12075860           | 1002683            | 0.5563 |
| Soil      | Average Neighbor          | 6746206           | 10300797169       | 12978877           | 946074             | 0.5472 |
| Soil      | USEARCH (w/DGC)           | 4851924           | 10308165644       | 5610402            | 2840356            | 0.5404 |
| Soil      | USEARCH (w/AGC)           | 5592316           | 10304608407       | 9167639            | 2099964            | 0.5244 |
| Soil      | OTUCLUST                  | 6714016           | 6909706980        | 18444775           | 978264             | 0.4819 |
| Soil      | Negative Predictive Value | 7382082           | 10286785610       | 26990436           | 310198             | 0.4534 |
| Soil      | FN                        | 7438201           | 10283907614       | 29868432           | 254079             | 0.4386 |
| Soil      | Nearest Neighbor          | 1571726           | 10313677482       | 98564              | 6120554            | 0.4383 |
| Soil      | Sensitivity               | 7440261           | 10283040048       | 30735998           | 252019             | 0.4335 |
| Soil      | Furthest Neighbor         | 501819            | 10313776046       | 0                  | 7190461            | 0.2553 |
| Soil      | Swarm                     | 237705            | 10313770690       | 5356               | 7454575            | 0.1738 |
| Marine    | F1-score                  | 7914666           | 2870997648        | 1894417            | 1306272            | 0.8317 |
| Marine    | MCC (separate OTUs)       | 7670655           | 2871231788        | 1660277            | 1550283            | 0.8266 |
| Marine    | MCC (single OTU)          | 7428998           | 2871482154        | 1409911            | 1791940            | 0.8223 |
| Marine    | FPS + FNs                 | 7264205           | 2871683595        | 1208470            | 1956733            | 0.8214 |
| Marine    | TP + TN                   | 7211154           | 2871739258        | 1152807            | 2009784            | 0.8206 |
| Marine    | Accuracy                  | 7119498           | 2871802386        | 1089679            | 2101440            | 0.8178 |
| Marine    | VSEARCH (w/AGC)           | 8566881           | 2865055591        | 7836474            | 654057             | 0.6954 |
| Marine    | VSEARCH (w/AGC)           | 8867443           | 2862976753        | 9915312            | 353495             | 0.6725 |
| Marine    | Sumaclus                  | 8867317           | 2862856105        | 10035960           | 353621             | 0.6703 |
| Marine    | USEARCH (w/DGC)           | 6929948           | 2867522405        | 9356960            | 2290990            | 0.6494 |
| Marine    | Average Neighbor          | 8914621           | 2861348612        | 11543453           | 306317             | 0.6476 |
| Marine    | USEARCH (w/AGC)           | 7352302           | 2865419824        | 7472241            | 1868636            | 0.6274 |
| Marine    | Nearest Neighbor          | 3742329           | 2872622032        | 270033             | 5478609            | 0.6144 |
| Marine    | OTUCLUST                  | 8945456           | 1834755673        | 15224413           | 275482             | 0.5965 |
| Marine    | Negative Predictive Value | 9131188           | 2853099098        | 19792967           | 89750              | 0.5572 |
| Marine    | Sensitivity               | 9136046           | 2852367594        | 20524471           | 84892              | 0.5504 |
| Marine    | FN                        | 9143826           | 2852250720        | 20641345           | 77112              | 0.5498 |
| Marine    | Furthest Neighbor         | 620264            | 2872892065        | 0                  | 8600674            | 0.2589 |
| Marine    | Swarm                     | 149810            | 2872888019        | 4046               | 9071128            | 0.1256 |
| Mice      | MCC (separate OTUs)       | 4829770           | 520373752         | 491600             | 692559             | 0.8898 |
| Mice      | F1-score                  | 4850792           | 520347542         | 517810             | 671537             | 0.8897 |
| Mice      | FPS + FNs                 | 4771312           | 520439019         | 426333             | 751016             | 0.8895 |
| Mice      | TP + TN                   | 4770937           | 520439150         | 426202             | 751392             | 0.8894 |
| Mice      | Accuracy                  | 4769575           | 520440407         | 424945             | 752754             | 0.8894 |
| Mice      | MCC (single OTU)          | 4879087           | 518832093         | 2033259            | 643242             | 0.7873 |
| Mice      | VSEARCH (w/AGC)           | 5100191           | 517549332         | 3316020            | 422138             | 0.7450 |
| Mice      | USEARCH (w/DGC)           | 4905962           | 517883072         | 2982280            | 616367             | 0.7402 |
| Mice      | Average Neighbor          | 5326219           | 516873116         | 3992236            | 196110             | 0.7393 |
| Mice      | Sumaclus                  | 5317976           | 516662498         | 4202854            | 204353             | 0.7301 |
| Mice      | VSEARCH (w/AGC)           | 5322737           | 516622070         | 4243282            | 199592             | 0.7290 |
| Mice      | USEARCH (w/AGC)           | 5243162           | 516749770         | 4115582            | 279167             | 0.7260 |
| Mice      | Negative Predictive Value | 5426962           | 515767988         | 5097364            | 95366              | 0.7082 |
| Mice      | Sensitivity               | 5439118           | 515571271         | 5294081            | 83211              | 0.7028 |
| Mice      | FN                        | 5451490           | 515436798         | 5428554            | 70839              | 0.6996 |
| Mice      | OTUCLUST                  | 5297141           | 469202414         | 5087312            | 225188             | 0.6953 |
| Mice      | Nearest Neighbor          | 1482308           | 520843906         | 21446              | 4040021            | 0.5122 |
| Mice      | Swarm                     | 1237099           | 520494387         | 370965             | 4285230            | 0.4123 |
| Mice      | Furthest Neighbor         | 665512            | 520865352         | 0                  | 4856816            | 0.3455 |
| Human     | F1-score                  | 26073348          | 7321213423        | 2922678            | 4270391            | 0.8785 |
| Human     | MCC (separate OTUs)       | 25861724          | 7321423671        | 2712430            | 4482015            | 0.8778 |
| Human     | FPS + FNs                 | 25512998          | 7321813377        | 2322724            | 4830740            | 0.8774 |
| Human     | MCC (single OTU)          | 25680854          | 7321538561        | 2597540            | 4662885            | 0.8762 |
| Human     | TP + TN                   | 25399667          | 7321870325        | 2265776            | 4944072            | 0.8762 |
| Human     | Accuracy                  | 25352243          | 7321910658        | 2225443            | 4991496            | 0.8759 |
| Human     | VSEARCH (w/AGC)           | 26845545          | 7309824393        | 14311708           | 3498194            | 0.7585 |
| Human     | VSEARCH (w/AGC)           | 28561130          | 7301551637        | 22584464           | 1782609            | 0.7237 |
| Human     | Negative Predictive Value | 29719012          | 7292417394        | 31718707           | 624727             | 0.6867 |
| Human     | Sensitivity               | 29818923          | 7288099634        | 36036467           | 524816             | 0.6657 |
| Human     | FN                        | 29888157          | 7287209148        | 36926953           | 455582             | 0.6623 |
| Human     | Nearest Neighbor          | 8062473           | 7323981460        | 154641             | 22281266           | 0.5097 |
| Human     | Swarm                     | 4358052           | 7323725163        | 410938             | 25985688           | 0.3615 |
| Human     | Furthest Neighbor         | 2637845           | 7324136101        | 0                  | 27705894           | 0.2942 |
| Human     | Average Neighbor          |                   |                   |                    |                    |        |
| Human     | OTUCLUST                  |                   |                   |                    |                    |        |
| Human     | Sumaclus                  |                   |                   |                    |                    |        |
| Human     | USEARCH (w/AGC)           |                   |                   |                    |                    |        |
| Human     | USEARCH (w/DGC)           |                   |                   |                    |                    |        |
| Even      | MCC (separate OTUs)       | 17174             | 66762945          | 2465               | 5319               | 0.8171 |
| Even      | F1-score                  | 17586             | 66762397          | 3013               | 4907               | 0.8169 |
| Even      | MCC (single OTU)          | 17174             | 66762930          | 2480               | 5319               | 0.8168 |
| Even      | TP + TN                   | 16378             | 66763755          | 1655               | 6115               | 0.8132 |
| Even      | Accuracy                  | 16349             | 66763784          | 1626               | 6144               | 0.8130 |
| Even      | FPS + FNs                 | 16312             | 66763795          | 1615               | 6181               | 0.8123 |
| Even      | Average Neighbor          | 15607             | 66763393          | 2017               | 6886               | 0.7838 |
| Even      | Nearest Neighbor          | 12448             | 66764886          | 524                | 10046              | 0.7287 |
| Even      | USEARCH (w/DGC)           | 12950             | 66762468          | 2942               | 9544               | 0.6847 |
| Even      | Negative Predictive Value | 20746             | 66744250          | 21160              | 1747               | 0.6768 |
| Even      | VSEARCH (w/AGC)           | 12340             | 66762579          | 2831               | 10153              | 0.6679 |
| Even      | VSEARCH (w/AGC)           | 12340             | 66762579          | 2831               | 10153              | 0.6679 |
| Even      | Furthest Neighbor         | 9434              | 66765410          | 0                  | 13059              | 0.6475 |
| Even      | Sumaclus                  | 12559             | 66761243          | 4167               | 9934               | 0.6474 |
| Even      | FN                        | 21047             | 66738879          | 26531              | 1446               | 0.6436 |
| Even      | Sensitivity               | 21106             | 66735974          | 29436              | 1387               | 0.6299 |
| Even      | USEARCH (w/AGC)           | 11260             | 66761521          | 3889               | 11233              | 0.6096 |
| Even      | OTUCLUST                  | 16844             | 66725346          | 18107              | 5649               | 0.6007 |
| Even      | Swarm                     | 520               | 66765401          | 9                  | 21973              | 0.1507 |
| Staggered | MCC (separate OTUs)       | 17069             | 66763106          | 2304               | 5424               | 0.8176 |
| Staggered | F1-score                  | 17584             | 66762432          | 2978               | 4909               | 0.8176 |
| Staggered | MCC (single OTU)          | 17200             | 66762827          | 2583               | 5293               | 0.8154 |
| Staggered | Accuracy                  | 16337             | 66763813          | 1597               | 6156               | 0.8134 |
| Staggered | FPS + FNs                 | 16313             | 66763811          | 1599               | 6180               | 0.8127 |
| Staggered | TP + TN                   | 16319             | 66763779          | 1631               | 6174               | 0.8121 |
| Staggered | Average Neighbor          | 16142             | 66762854          | 2556               | 6351               | 0.7871 |
| Staggered | Nearest Neighbor          | 12413             | 66764886          | 524                | 10080              | 0.7276 |
| Staggered | Sumaclus                  | 15377             | 66760390          | 5020               | 7116               | 0.7178 |
| Staggered | VSEARCH (w/AGC)           | 15095             | 66760823          | 4587               | 7398               | 0.7173 |
| Staggered | USEARCH (w/AGC)           | 14630             | 66761174          | 4236               | 7863               | 0.7101 |
| Staggered | VSEARCH (w/AGC)           | 13567             | 66762304          | 3106               | 8926               | 0.7005 |
| Staggered | USEARCH (w/DGC)           | 13244             | 66762537          | 2873               | 9250               | 0.6955 |
| Staggered | Negative Predictive Value | 20724             | 66744588          | 20822              | 1769               | 0.6783 |
| Staggered | Furthest Neighbor         | 9575              | 66765410          | 0                  | 12918              | 0.6524 |
| Staggered | FN                        | 21018             | 66738538          | 26872              | 1475               | 0.6413 |
| Staggered | Sensitivity               | 20981             | 66737899          | 27511              | 1512               | 0.6361 |
| Staggered | OTUCLUST                  | 15625             | 66371336          | 15527              | 6868               | 0.5903 |
| Staggered | Swarm                     | 443               | 66765408          | 2                  | 22050              | 0.1400 |
